# Supplementary material
Source: PubMed Central journal article supplement (PMC6195448)
Supplement: NIHMS980523-supplement-Supp_info.pdf [file NIHMS980523-supplement-Supp_info.pdf]

Supplementary information for  
**The Dietary Flavone Luteolin Epigenetically Activates the Nrf2 Pathway and Blocks  
Cell Transformation in Human Colorectal Cancer HCT116 Cells**

## Figure S1

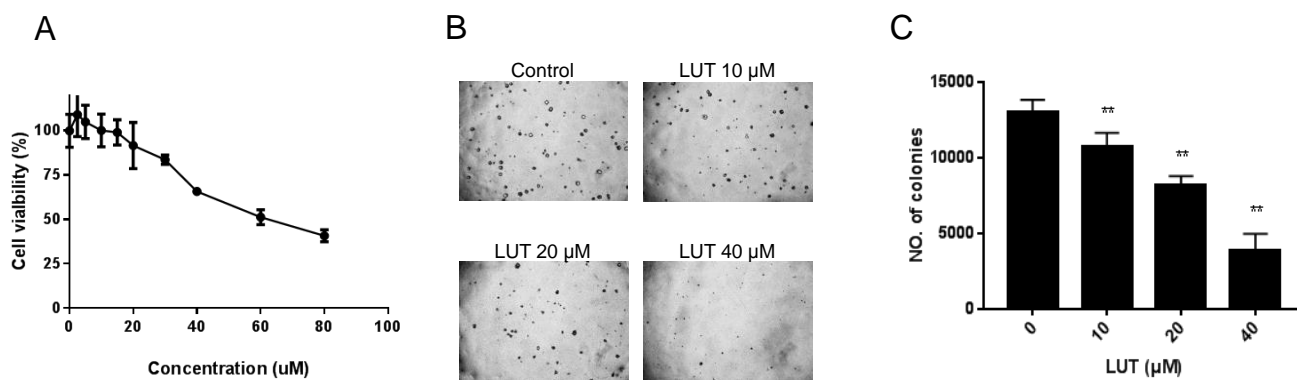

LUT inhibited cell viability and anchorage-independent growth of HT29 cells. (A) HT29 cells were plated in a 96-well plate at an initial density of 3000 cells/well then treated with various concentration of LUT for 3 days. The result shows LUT inhibited HT29 cell viability in a dose-dependent manner. (B,C) LUT inhibited the anchorage-independent growth of HCT116 cells. Representative images of colonies are shown in B. The average per well colony numbers from three independent experiments are shown in D. The data are presented as mean  $\pm$  SD. \*\*  $P < 0.01$  versus the control group.
